# Supplementary material for: Noncontrast Computed Tomography Signs as Predictors of Hematoma Expansion, Clinical Outcome, and Response to Tranexamic Acid in Acute Intracerebral Hemorrhage
Source: PubMed Central journal article supplement (PMC6924948; doi:10.1161/strokeaha.119.026128), 2019-11-18
Supplement: str-51-121-s001.pdf [file str-51-121-s001.pdf]

## SUPPLEMENTAL MATERIALS

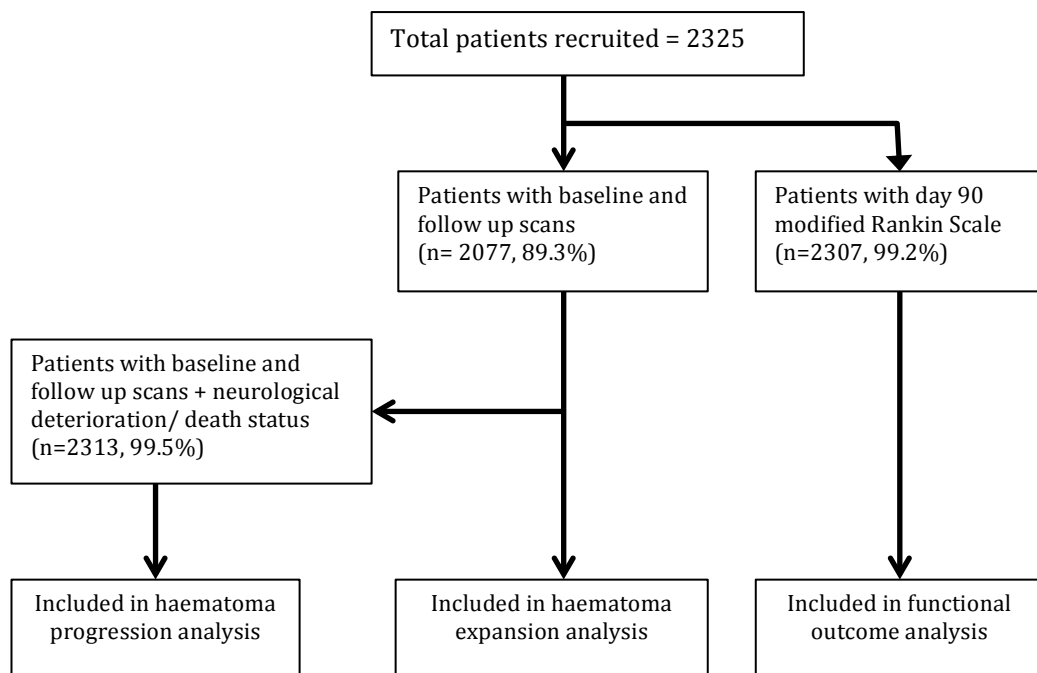

Figure I Flow chart showing numbers included in analysis.

Table I Diagnostic accuracy of NCCT signs for haematoma expansion and poor functional outcome

| <b>Haematoma expansion</b>                                       | Se                   | Sp                   | PPV                  | NPV                  | PLR              | NLR              | Accuracy             |
|------------------------------------------------------------------|----------------------|----------------------|----------------------|----------------------|------------------|------------------|----------------------|
| Blend sign                                                       | 23.3%<br>(19.9-27.0) | 88.1%<br>(86.3-89.7) | 42.5%<br>(37.6-47.5) | 75.2%<br>(74.3-76.1) | 1.95 (1.60-2.39) | 0.87 (0.83-0.91) | 70.3%<br>(68.3-72.3) |
| Black hole sign                                                  | 22.8%<br>(19.4-26.5) | 85.5%<br>(83.7-87.3) | 37.4%<br>(32.9-42.0) | 74.6%<br>(73.6-75.5) | 1.58 (1.30-1.92) | 0.90 (0.86-0.95) | 68.3%<br>(66.3-70.3) |
| Hypodensity                                                      | 39.5%<br>(35.5-43.7) | 75.8%<br>(73.5-77.9) | 38.1%<br>(35.0-41.4) | 76.8%<br>(75.5-78.1) | 1.63 (1.42-1.87) | 0.80 (0.74-0.86) | 65.8%<br>(63.7-67.9) |
| Island sign                                                      | 11.4%<br>(8.9-14.3)  | 93.2%<br>(91.9-94.5) | 38.9%<br>(32.2-46.1) | 73.6%<br>(72.9-74.2) | 1.69 (1.25-2.27) | 0.95 (0.92-0.98) | 70.8%<br>(68.8-72.7) |
| Any NCCT sign                                                    | 52.3%<br>(48.1-56.5) | 66.8%<br>(64.3-69.2) | 37.3%<br>(34.9-39.8) | 78.7%<br>(77.1-80.3) | 1.57 (1.42-1.75) | 0.71 (0.65-0.78) | 62.8%<br>(60.7-64.9) |
| <b>Poor functional outcome (modified Rankin Scale of 4 to 6)</b> |                      |                      |                      |                      |                  |                  |                      |
| Blend sign                                                       | 20.1%<br>(17.9-22.4) | 88.7%<br>(86.6-90.6) | 68.1%<br>(63.5-72.4) | 47.9%<br>(47.1-48.8) | 1.77 (1.45-2.18) | 0.90 (0.87-0.93) | 51.2%<br>(49.1-53.3) |
| Black hole sign                                                  | 24.0%<br>(21.6-26.5) | 88.8%<br>(86.7-90.6) | 72.0%<br>(67.8-75.9) | 49.2%<br>(48.3-50.2) | 2.14 (1.75-2.61) | 0.86 (0.82-0.89) | 53.4%<br>(51.3-55.4) |
| Hypodensity                                                      | 39.2%<br>(36.5-42.0) | 79.5%<br>(76.9-81.9) | 69.8%<br>(66.8-72.6) | 52.0%<br>(50.7-53.4) | 1.91 (1.66-2.20) | 0.76 (0.72-0.81) | 57.5%<br>(55.4-59.5) |
| Island sign                                                      | 14.3%<br>(12.4-16.4) | 97.8%<br>(96.7-98.6) | 88.5%<br>(83.4-92.2) | 48.6%<br>(48.0-49.3) | 6.39 (4.17-9.78) | 0.88 (0.85-0.90) | 52.2%<br>(50.1-54.3) |
| Any NCCT sign                                                    | 52.2%<br>(49.3-55.0) | 69.5%<br>(66.6-72.3) | 67.4%<br>(65.0-69.7) | 54.6%<br>(52.9-56.4) | 1.71 (1.54-1.90) | 0.69 (0.64-0.74) | 60.0%<br>(58.0-62.1) |

Se=sensitivity; Sp=specificity; PPV=positive predictive value; NPV=negative predictive value; PLR=positive likelihood ratio; NLR=negative likelihood ratio.

Table II Comparison of baseline haematoma volume, onset to CT time and history of antiplatelet between patients with and without noncontrast CT signs

|               | Baseline HV (mL)  | Onset to CT time (hours) | Prior antiplatelet |
|---------------|-------------------|--------------------------|--------------------|
| Blend +       | 38.1 [18.2, 68.6] | 1.9 [1.4, 3.0]           | 97 (26.5)          |
| Blend -       | 10.9 [4.7, 25.4]  | 1.9 [1.4, 2.8]           | 493 (25.9)         |
| P             | <0.001            | 0.68                     | 0.80               |
| Black hole +  | 36.0 [19.6, 62.0] | 1.8 [1.3, 2.6]           | 111 (26.8)         |
| Black hole -  | 10.5 [4.6, 24.5]  | 2.0 [1.4, 3.0]           | 479 (25.8)         |
| P             | <0.001            | 0.003                    | 0.67               |
| Hypodensity + | 32.1 [15.7, 59.6] | 1.8 [1.3, 2.7]           | 185 (26.4)         |
| Hypodensity - | 8.9 [4.0, 19.2]   | 2.0 [1.4, 3.0]           | 407 (25.9)         |
| P             | <0.001            | 0.026                    | 0.79               |
| Island +      | 64.6 [39.3, 84.5] | 2.0 [1.4, 3.1]           | 69 (34.5)          |
| Island -      | 11.8 [5.00, 26.4] | 1.9 [1.4, 2.8]           | 521 (25.1)         |
| P             | <0.001            | 0.21                     | 0.004              |

\*Data are median [interquartile range] or number (%). Analyses are Mann-Whitney U test and Chi-squared test. HV =haematoma volume

Supplemental Table III Multivariate logistic regression analysis for predictors of haematoma progression and total ICH expansion

| <b>Variables</b>             | <b>*Adjusted OR (Model 1)</b> | <b>p</b> | <b>†Adjusted OR (Model 2)</b> | <b>p</b> |
|------------------------------|-------------------------------|----------|-------------------------------|----------|
| <b>Haematoma progression</b> |                               |          |                               |          |
| Blend sign                   | 1.59 (1.20-2.11)              | 0.001    | 1.57 (1.19-2.08)              | 0.002    |
| Black hole sign              | 1.56 (1.02-2.38)              | 0.039    | -                             | -        |
| Hypodensities                | -                             | -        | 1.49 (1.07-2.07)              | 0.019    |
| Island sign                  | 0.94 (0.63-1.40)              | 0.76     | 0.95 (0.63-1.42)              | 0.79     |
| <b>Total ICH expansion</b>   |                               |          |                               |          |
| Blend sign                   | 1.64 (1.25-2.17)              | <0.001   | 1.60 (1.21-2.12)              | 0.001    |
| Black hole sign              | 1.97 (1.30-2.99)              | 0.001    | -                             | -        |
| Hypodensities                | -                             | -        | 1.97 (1.41-2.76)              | <0.001   |
| Island sign                  | 0.93 (0.63-1.37)              | 0.72     | 0.94 (0.64-1.38)              | 0.73     |

\* Model 1 excludes hypodensities with adjustment for age, sex, premorbid mRS, systolic blood pressure, GCS, presence of IVH on baseline scan, lobar location, baseline haematoma volume, onset to CT time, prior antiplatelet therapy, treatment with tranexamic acid, black hole sign X haematoma volume. † Model 2 excludes black hole sign with adjustment of covariates similar to Model 1.
